# Supplementary material
Source: publisher figshare collection journal article supplement (https://acs.figshare.com/ndownloader/files/4622326)
Supplement: Supplementary file 1 [file 4622326]

## **SUPPLEMENTAL INFORMATION**

### **Variability of Particle Number Emissions from Diesel and Hybrid Diesel-Electric Buses in Real Driving Conditions**

Darrell B. Sonntag, H. Oliver Gao, Britt A. Holmén

Summary of Supplemental Information

Total Pages: 18

Number of Figures: 10

Number of Tables: 17



This **SUPPLEMENTAL INFORMATION** provides detailed testing schedule information, specifications for the two bus technologies, additional route average operating parameters, graphs of average particle concentration for each bus run, model diagnostic tests, fixed effects for interaction parameters, and differences in least-square means.

**Table S-1. Specifications of Conventional Diesel and Hybrid Diesel-Electric Buses Tested**

| Specification                    | Conventional Diesel (CD)                                    | Hybrid Diesel-Electric (HDE)                                        |
|----------------------------------|-------------------------------------------------------------|---------------------------------------------------------------------|
| Engine                           | 2002 Detroit Diesel Series 40E                              | 2003 Cummins ISL 280                                                |
| # cylinders, displacement (L)    | 6 cyl., 8.7 L                                               | 6 cyl., 8.9 L                                                       |
| Transmission                     | Allison B400R Automatic                                     | Allison EP 40                                                       |
| Rated Power @ 2000 RPM, bhp (kW) | 280 (205)                                                   | 289 (205)                                                           |
| Peak Torque, lb-ft (N-m)         | 900 (1166)                                                  | 900 (1220)                                                          |
| Combustion/Fuel System           | Direct Injection                                            | Electronic Timing Control                                           |
| Exhaust Aftertreatment           | Phase I - II: single-brick DOC;<br>Phase III: Englehard DPX | Phase I-II: dual-brick DOC<br>Phase III: Johnson-Matthew<br>CRT DPF |
| Electric motors                  | N/A                                                         | Two Concentric AC Induction<br>Motors                               |
| Battery                          | N/A                                                         | Sealed Nickel-Metal Hydride                                         |
| Bus mileage prior to testing, mi | 78,400 (201)<br>67,000 (202)                                | 29,600 (H301)<br>28,800 (H302)                                      |
| Weight, kg                       | 13,086 (empty)                                              | 13,318 (empty)                                                      |



**Table S-2. Summary of Testing Days Used in Statistical Analysis**

|                                                        | CD Bus 1 | CD Bus 2            | HDE Bus1            | HDE Bus 2 |
|--------------------------------------------------------|----------|---------------------|---------------------|-----------|
| <b>Phase I</b>                                         |          |                     |                     |           |
| <i>Fuel: No. 1 Diesel</i>                              | 23-Jan   | 11-Feb              | 6-Jan               | 27-Feb    |
| <i>Aftertreatment: DOC</i>                             | 30-Jan   | 13-Feb <sup>a</sup> | 21-Jan              | 30-Apr    |
| <i>Ambient Temperature Range:</i><br>(-9.4 to 22.8 °C) | 23-Apr   | 18-Feb <sup>b</sup> | 16-Apr              |           |
|                                                        |          | 28-Apr              | 21-Apr              |           |
|                                                        |          | 26-May              |                     |           |
|                                                        |          | 27-May              |                     |           |
| <b>Phase II</b>                                        |          |                     |                     |           |
| <i>Fuel: ULSD</i>                                      | 6-Aug    | 20-Sep              | 29-Jul              | 25-Aug    |
| <i>Aftertreatment: DOC</i>                             | 10-Aug   | 21-Sep              | 3-Aug               | 26-Aug    |
| <i>Ambient Temperature Range:</i><br>(18.2 to 29.4 °C) |          |                     | 4-Aug               |           |
| <b>Phase III</b>                                       |          |                     |                     |           |
| <i>Fuel: ULSD</i>                                      | 20-Oct   | 9-Nov               | 12-Oct <sup>c</sup> | 2-Nov     |
| <i>Aftertreatment: DOC+DPF</i>                         | 25-Oct   | 10-Nov              | 13-Oct              | 3-Nov     |
| <i>Ambient Temperature Range:</i><br>(0.6 to 18.9 °C)  |          |                     | 15-Oct              |           |

<sup>a</sup> Missing Avon Inbound and Farmington Inbound runs. <sup>b</sup> Each inbound and outbound run was made twice (16 runs) <sup>c</sup> Missing Enfield runs

### Details on Experimental Data

Table S-2 contains the testing schedule, bus number, fuel/aftertreatment configuration. Figures S-1 through S-6 graphically display the average particle number concentration as recorded on each bus run for each day of testing.

On February 18<sup>th</sup>, two complete runs were made, providing an additional set of replications (2 inbound and 2 outbound runs for each route). On two days of the study, issues arose that prevented all of the routes to be recorded, or caused the recorded data to be unrepresentative of true conditions. On February 13<sup>th</sup>, the air compressor used with the dilution system failed before the Avon Inbound and Farmington Inbound routes could be measured. On October 12<sup>th</sup> all of the routes except the Enfield route were measured. The remaining data that was correctly recorded for these days was included in the statistical analysis.

Several testing days were not included in the statistical analysis due to issues with the sampling equipment that yielded unrepresentative measurements of the true particle number concentration. On May 28<sup>th</sup> and June 2<sup>nd</sup> the desiccant became saturated from rain, this erroneously affected the formation of particles on all routes. On November 16<sup>th</sup> and 17<sup>th</sup> there was excessive vibration on the HDE buses, which caused the ELPI to yield erroneously high counts to be recorded for these two days, except for the Farmington route, which may have been because the bus was operating at lower speeds. More complete information on the testing setup and schedule is available in Holmen *et al.* (9)



**Table S-3. Table 1.** Engine Speed by Routes for both Bus Technologies <sup>a</sup>

| <b>Engine Speed (rpm)</b> | <b>Conventional</b> |         |             | <b>Hybrid Diesel-Electric</b> |         |             |
|---------------------------|---------------------|---------|-------------|-------------------------------|---------|-------------|
|                           | Average             | St. Dev | (Min/Max)   | Average                       | St. Dev | (Min/Max)   |
| Avon Down                 | 1340                | 72      | (1182/1471) | 1454                          | 145     | (1236/1762) |
| Avon Up                   | 1591                | 67      | (1473/1689) | 1841                          | 61      | (1722/1975) |
| Enfield                   | 1963                | 57      | (1868/2048) | 1873                          | 83      | (1734/2039) |
| Farmington                | 1055                | 26      | (978/1089)  | 993                           | 20      | (961/1048)  |

<sup>a</sup> Route parameters are recorded second-by-second using a Vansco USB Data Link Adapter on all 4 buses from April 16 onward. 9 pre-April testing days are not included, and 1 Enfield run from Nov. 9 is missing. <sup>b</sup> The listed values are averages, standard deviations, minimums and maximums of averages. The second-by-second data is averaged for each route, and then the average, minimum, and maximum across all test runs were calculated.



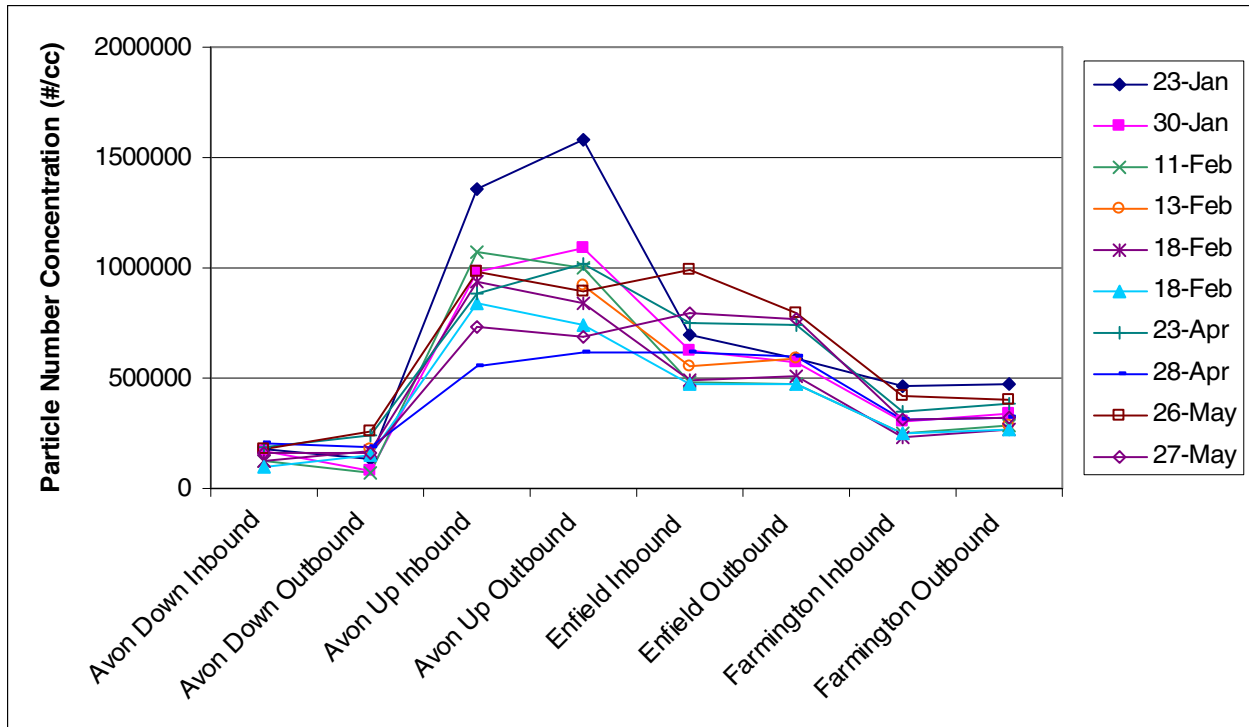

**Figure S-1. Particle Number Concentrations according to Route and Testing Day for Conventional Diesel Buses on No. 1 Diesel Fuel**

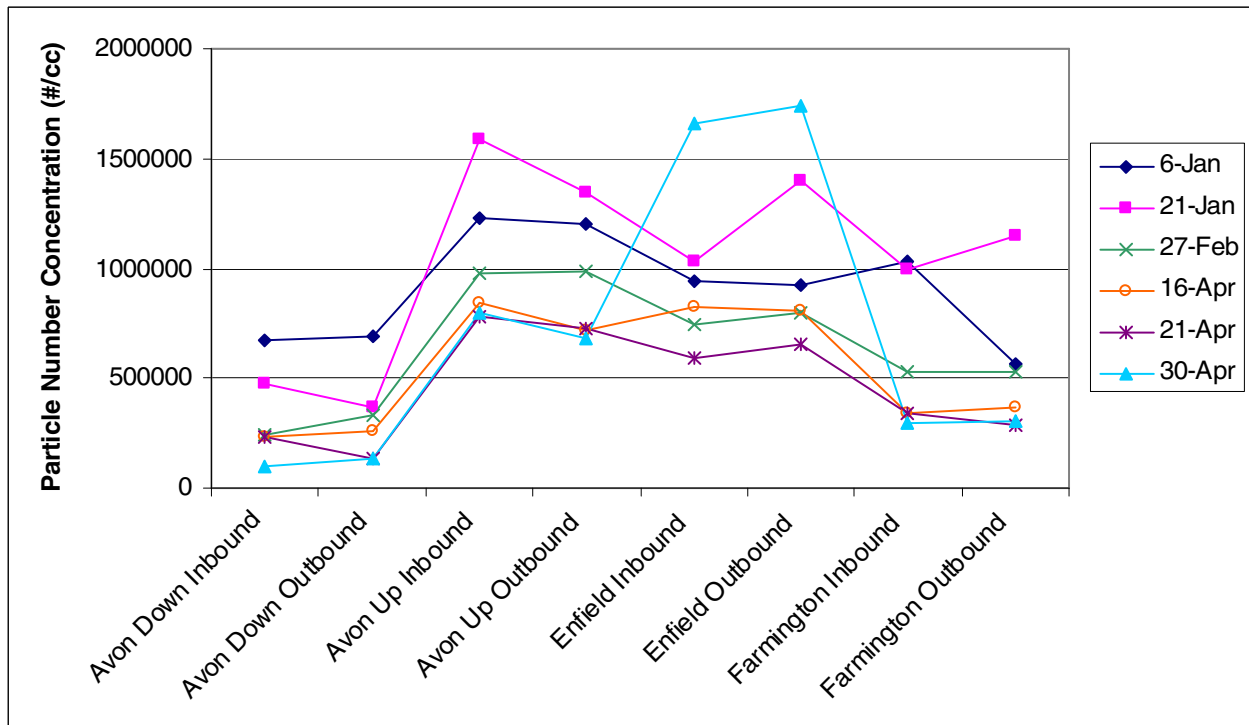

**Figure S-2. Particle Number Concentrations according to Route and Testing Day for Hybrid Diesel-Electric Buses on No. 1 Diesel Fuel**



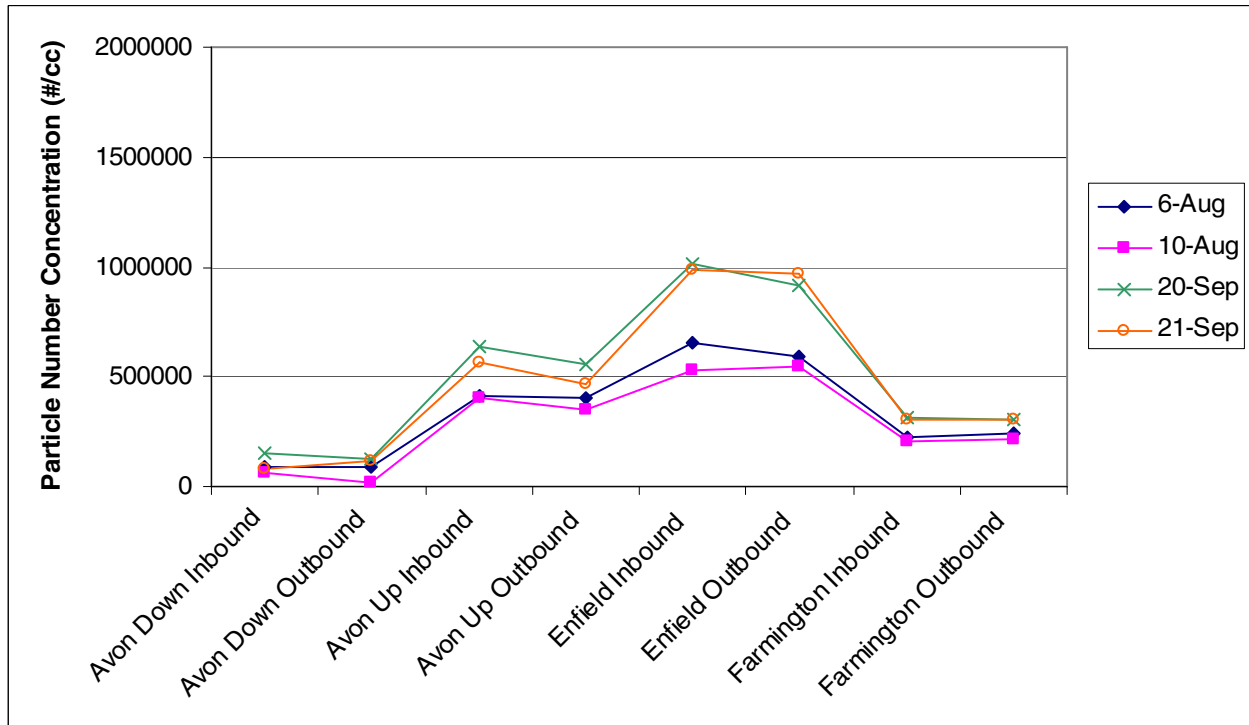

**Figure S-3. Particle Number Concentrations according to Route and Testing Day for Conventional Diesel Buses on ULSD fuel**

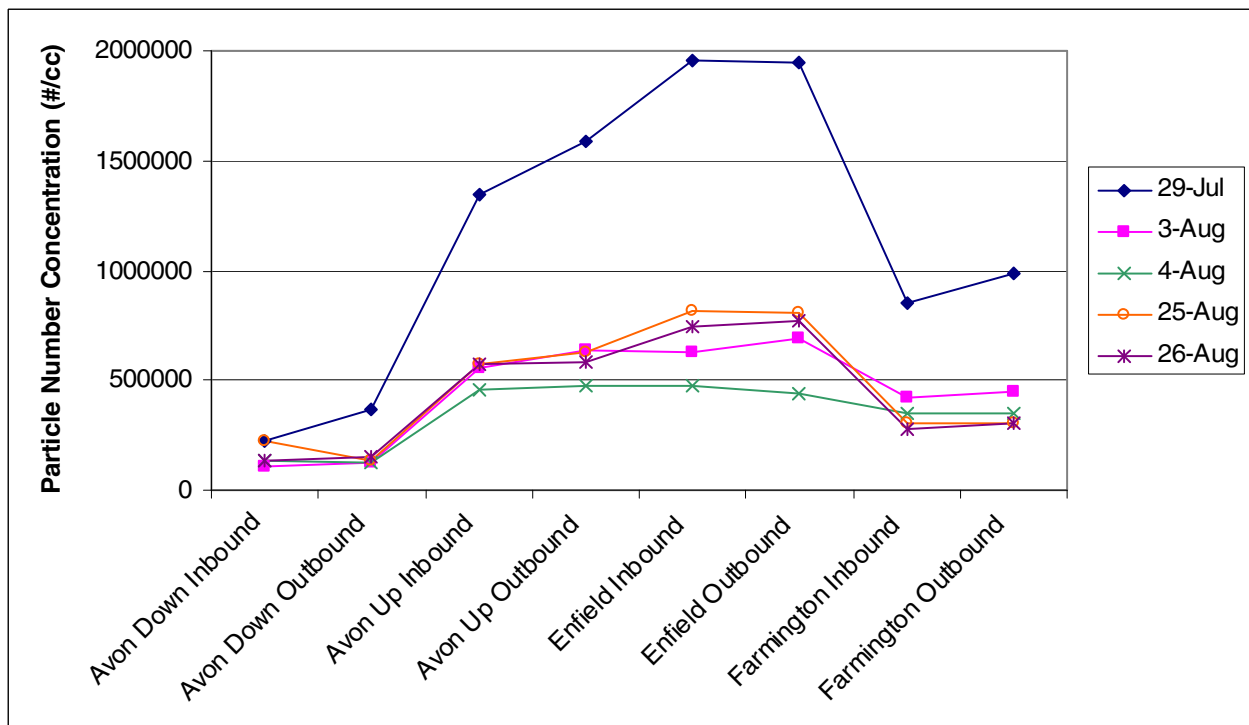

**Figure S-4. Particle Number Concentrations according to Route and Testing Day for Hybrid Diesel-Electric Buses on ULSD fuel**



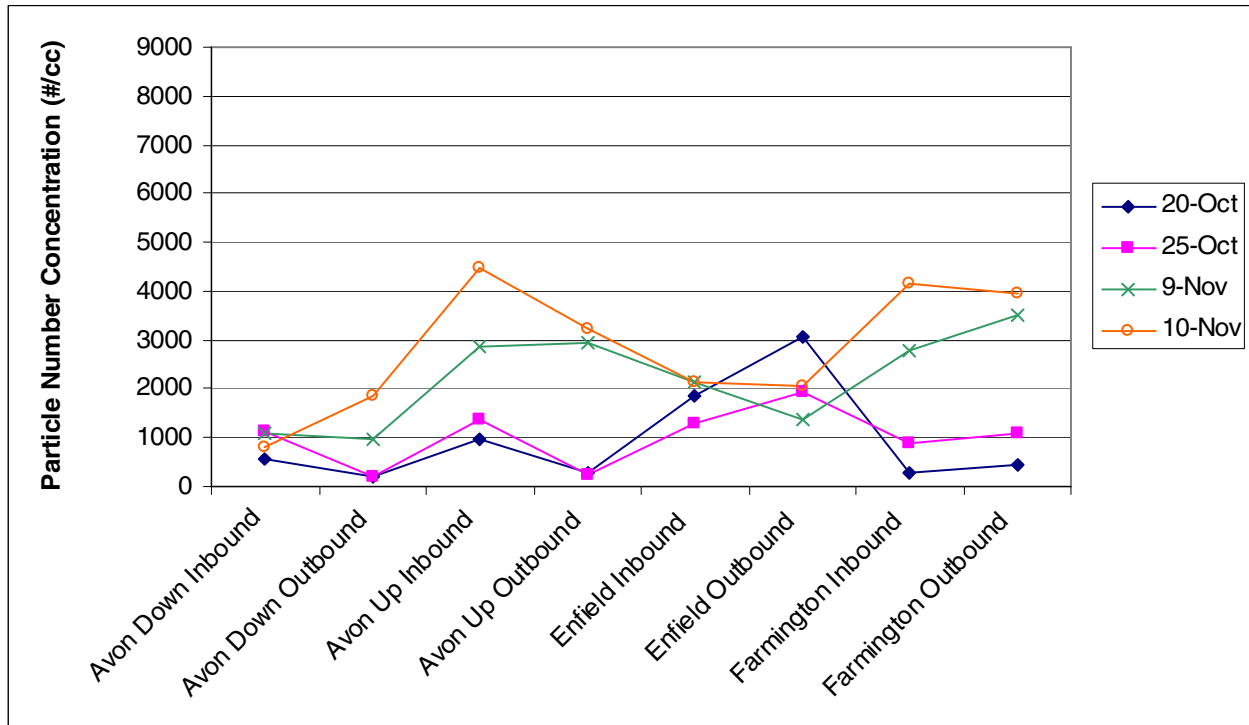

**Figure S-5. Particle Number Concentrations according to Route and Testing Day for Conventional Diesel Buses on ULSD with Diesel Particulate Filters**

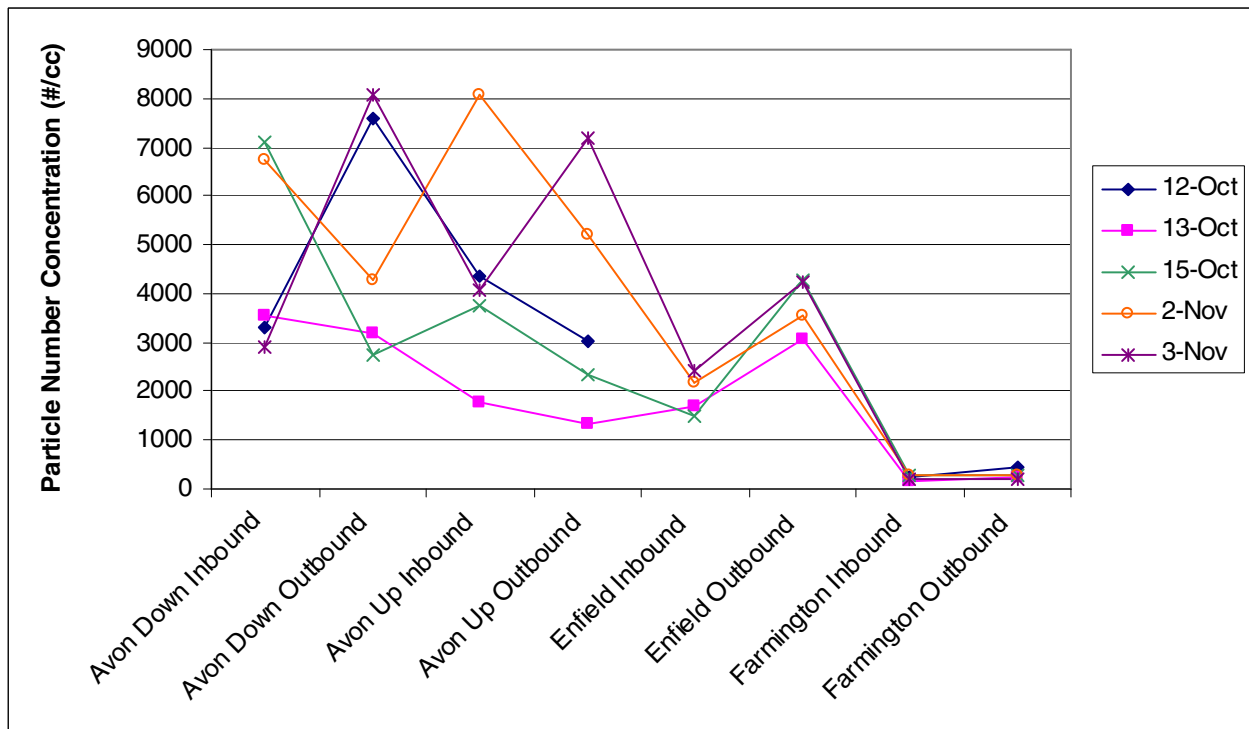

**Figure S-6. Particle Number Concentrations according to Route and Testing Day for Hybrid Diesel-Electric Buses on ULSD with Diesel Particulate Filters**



## Model Diagnostic Tests

The statistics for the model fit with homogeneous residuals are shown in Table S-4. In Figure S-7, the conditional studentized residuals from the full interaction model are plotted alongside the predicted emissions. The conditional studentized residuals account for both the random and fixed effects, and are corrected by their estimated standard error (10). The predicted values are clearly divided into two groups; the lower values correspond to the particle number emissions recorded from buses outfitted with the DPF. These have a noticeably higher variation than for the concentrations without DPFs. This property violates the model assumption that the residuals errors are independent and identically distributed.

**Table S-4. Homogeneous Residual Model Fit Statistics**

|                          |      |
|--------------------------|------|
| -2 Res Log Likelihood    | 6.8  |
| AIC (smaller is better)  | 12.8 |
| AICC (smaller is better) | 12.9 |
| BIC (smaller is better)  | 6.8  |

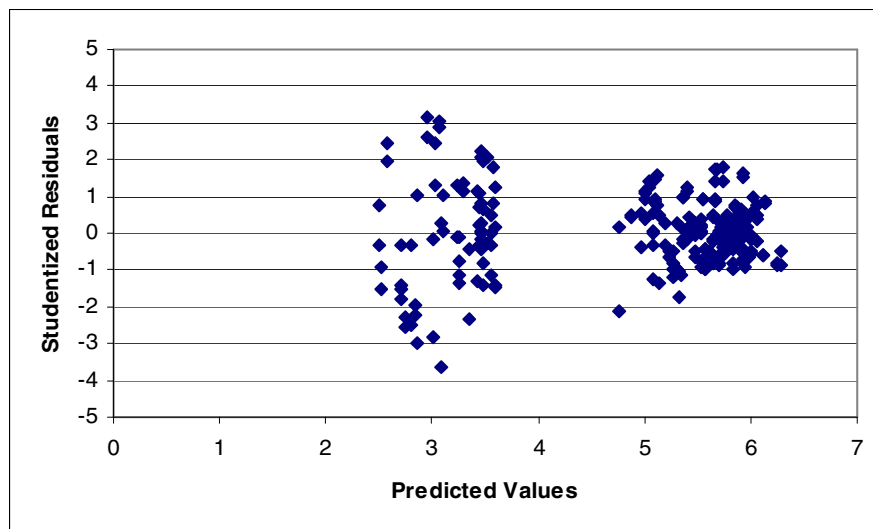

**Figure S-7. Residuals from Homogeneous Residual Variance**



To assure that the residuals are independent and identically distributed, we first implemented an alternative model that estimates a separate residual variance for the buses with and without DPFs (heterogeneous residual structure). The likelihood and other fit statistics are shown in Table S-5, which shows an increase in fit for all of the criteria. A likelihood ratio test determined that the heterogeneous residual model provides a significant increase in the goodness-of-fit ( $p$ -value  $< 0.0001$ ). Figure S-8 plots the studentized residuals from the alternative model that estimated separate residual variances for the DOC and DOC+DPF treatments. By implementing a heterogeneous residual structure the studentized residuals have more comparable variances.

The studentized residuals are useful for detecting outliers. Figure S-8 contains several residuals that are at least 3 standard errors from the mean, with one value almost 5 standard errors from the mean values. The experimental information was reviewed from these days to see if there were experimental errors that would warrant their removing from the analysis. No evidence was found that would suggest that the data points were unrepresentative of the testing measurements.

**Table S-5. Heterogeneous Residual Model Fit Statistics  
(Residuals Grouped according to DPF and DOC treatments)**

|                          |        |
|--------------------------|--------|
| -2 Res Log Likelihood    | -124.7 |
| AIC (smaller is better)  | -116.7 |
| AICC (smaller is better) | -116.5 |
| BIC (smaller is better)  | -124.7 |

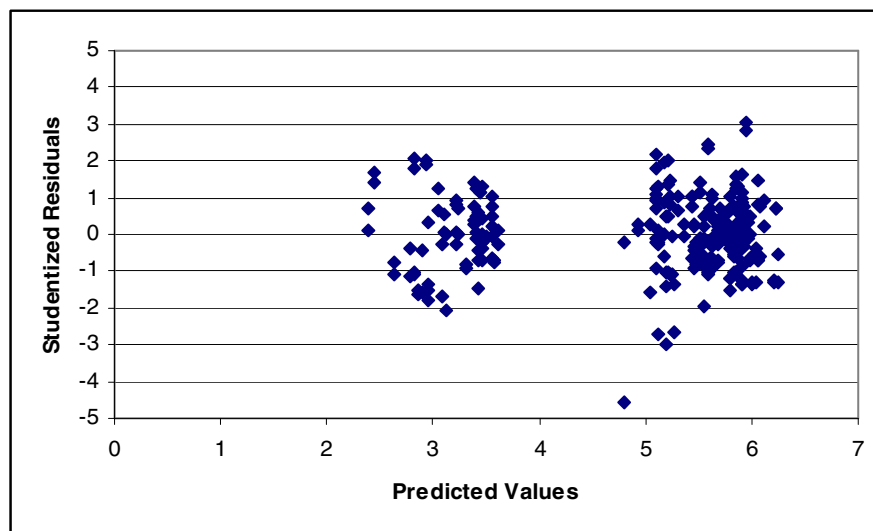

**Figure S-8. Residuals from Heterogeneous Residual Variances Grouped According to DOC and DPF treatments**



Next, we implemented a third model that estimated separate variance for the DPF treatment, as well as separate variances for each route under the DOC treatment (total of 5 residual variance terms). The fit statistics of the model were all improved as shown in Table S-6. A likelihood ratio test determined that the third model provided a significant increase in fit ( $p$ -value  $<0.0001$ ) over the previous model. All studentized residuals were within 3 standard errors as shown in Figure S-9. Standard normality tests were used to test if the residuals pass the normality assumptions in Table S-5 through S-9. All of the statistics are insignificant, meaning that the null hypothesis of normally distributed errors was not rejected for each residual group. By implementing the current heterogeneous residual structure, the large variability of the data was able to be modeled accurately without having to remove influential outliers.

**Table S-6. Heterogeneous Residual Model Fit Statistics (Residuals Grouped according to DPF and each route with DOC treatment)**

|                          |        |
|--------------------------|--------|
| -2 Res Log Likelihood    | -171.0 |
| AIC (smaller is better)  | -157.0 |
| AICC (smaller is better) | -156.5 |
| BIC (smaller is better)  | -171.0 |

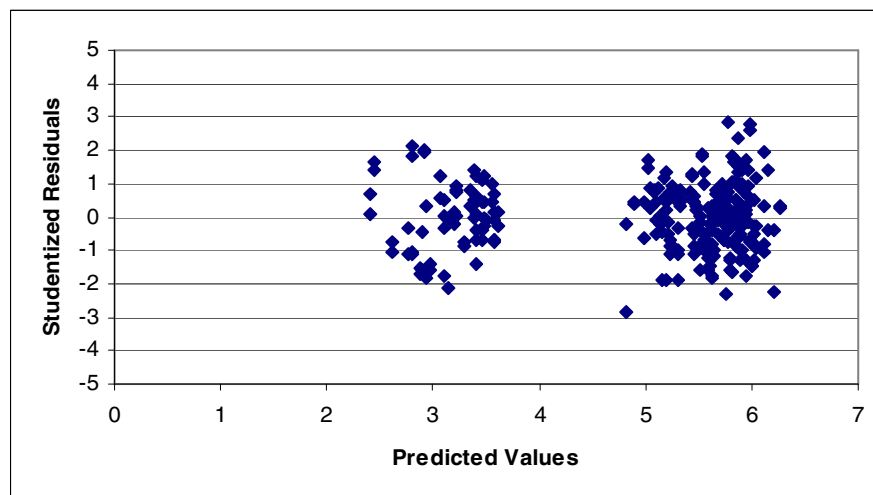

**Figure S-9. Residuals from Heterogeneous Residual Variances Grouped According to DOC and DPF, an Each Route with the DOC Treatment**



**Table S-5. Normality Tests for Residuals from Avon Down + DOC treatment**

| Test               | Statistic |          | p Value   |         |
|--------------------|-----------|----------|-----------|---------|
| Shapiro-Wilk       | W         | 0.973963 | Pr < W    | 0.3455  |
| Kolmogorov-Smirnov | D         | 0.096256 | Pr > D    | >0.1500 |
| Cramer-von Mises   | W-Sq      | 0.062684 | Pr > W-Sq | >0.2500 |
| Anderson-Darling   | A-Sq      | 0.389508 | Pr > A-Sq | >0.2500 |

**Table S-6. Normality Tests for residuals from Avon Up + DOC treatment**

| Test               | Statistic |          | p Value   |         |
|--------------------|-----------|----------|-----------|---------|
| Shapiro-Wilk       | W         | 0.98518  | Pr < W    | 0.7890  |
| Kolmogorov-Smirnov | D         | 0.058678 | Pr > D    | >0.1500 |
| Cramer-von Mises   | W-Sq      | 0.018977 | Pr > W-Sq | >0.2500 |
| Anderson-Darling   | A-Sq      | 0.174784 | Pr > A-Sq | >0.2500 |

**Table S-7. Normality Tests for residuals from Enfield + DOC treatment**

| Test               | Statistic |          | p Value   |         |
|--------------------|-----------|----------|-----------|---------|
| Shapiro-Wilk       | W         | 0.964446 | Pr < W    | 0.1365  |
| Kolmogorov-Smirnov | D         | 0.09405  | Pr > D    | >0.1500 |
| Cramer-von Mises   | W-Sq      | 0.054703 | Pr > W-Sq | >0.2500 |
| Anderson-Darling   | A-Sq      | 0.416065 | Pr > A-Sq | >0.2500 |

**Table S-8. Normality Tests for residuals from Farmington + DOC treatment**

| Test               | Statistic |          | p Value   |         |
|--------------------|-----------|----------|-----------|---------|
| Shapiro-Wilk       | W         | 0.979072 | Pr < W    | 0.5270  |
| Kolmogorov-Smirnov | D         | 0.059585 | Pr > D    | >0.1500 |
| Cramer-von Mises   | W-Sq      | 0.026199 | Pr > W-Sq | >0.2500 |
| Anderson-Darling   | A-Sq      | 0.219712 | Pr > A-Sq | >0.2500 |

**Table S-9. Normality Tests for residuals from DPF treatment**

| Test               | Statistic |          | p Value   |         |
|--------------------|-----------|----------|-----------|---------|
| Shapiro-Wilk       | W         | 0.986493 | Pr < W    | 0.6560  |
| Kolmogorov-Smirnov | D         | 0.047477 | Pr > D    | >0.1500 |
| Cramer-von Mises   | W-Sq      | 0.021333 | Pr > W-Sq | >0.2500 |
| Anderson-Darling   | A-Sq      | 0.181594 | Pr > A-Sq | >0.2500 |



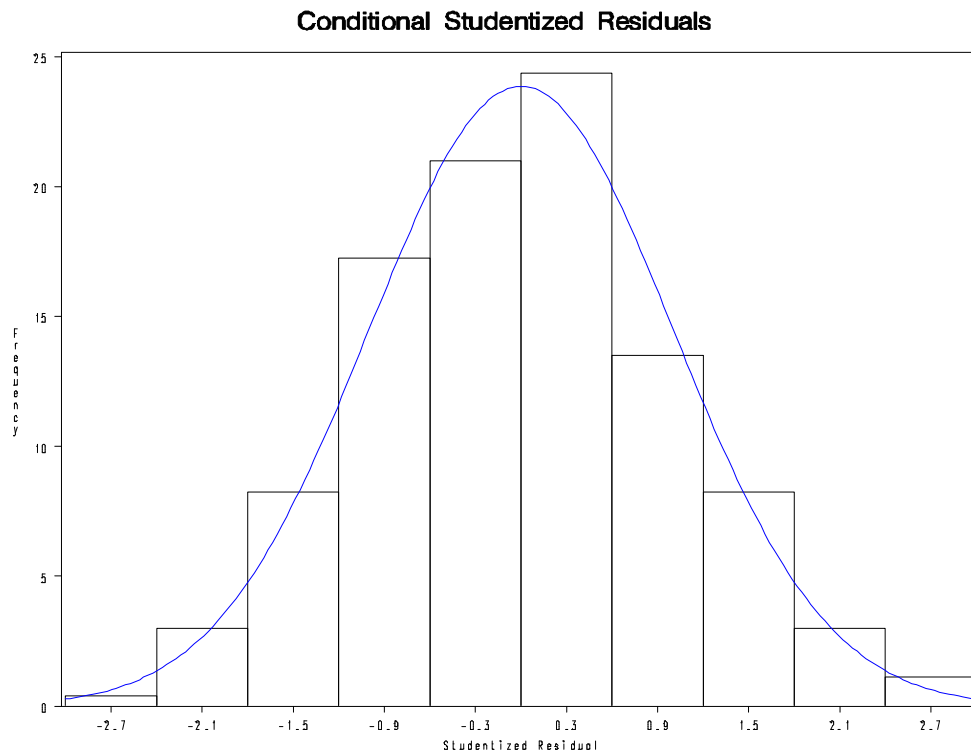

**Figure S-10. Histogram of Conditional Studentized Residuals with Heterogeneous Residuals Variances for the DPF Treatment, and each route under the DOC treatment.**



**Table S-10. Type 3 Tests of Fixed Effects.**

| <b>Effect</b>                     | <b>Num DF</b> | <b>Den DF</b> | <b>F Value</b> | <b>Pr &gt; F</b> |
|-----------------------------------|---------------|---------------|----------------|------------------|
| <b>Tech</b>                       | 1             | 2             | 13.93          | 0.0649           |
| <b>Fuel</b>                       | 1             | 22            | 0.03           | 0.8555           |
| <b>Aftertreatment</b>             | 1             | 22            | 180.53         | <.0001           |
| <b>Driver</b>                     | 1             | 22            | 4.89           | 0.0378           |
| <b>Temperature</b>                | 1             | 222           | 14.48          | 0.0002           |
| <b>Route</b>                      | 3             | 222           | 27.77          | <.0001           |
| <b>Tech*Fuel</b>                  | 1             | 22            | 0.54           | 0.4706           |
| <b>Tech*Aftertreatment</b>        | 1             | 22            | 0.67           | 0.4225           |
| <b>Tech*Route</b>                 | 3             | 222           | 9.42           | <.0001           |
| <b>Route*Driver</b>               | 3             | 222           | 27.27          | <.0001           |
| <b>Temperature*Aftertreatment</b> | 1             | 222           | 3.37           | 0.0677           |
| <b>Route*Aftertreatment</b>       | 3             | 222           | 17.55          | <.0001           |



**Table S-11 Fixed Effect Parameters (Including Interaction Effects) according to baseline case of: CD bus, ULSD fuel, DOC aftertreatment, Post-April Driver, and Farmington Route**

| Effect              |              |     | Estimate | Standard Error | DF  | t Value | Pr >  t |
|---------------------|--------------|-----|----------|----------------|-----|---------|---------|
| Intercept           |              |     | 5.6842   | 0.08533        | 2   | 66.61   | 0.0002  |
| Tech                | HDE          |     | 0.2878   | 0.08205        | 2   | 3.51    | 0.0725  |
| Tech                | CD           |     | 0        | .              | .   | .       | .       |
| Fuel                | #1 D         |     | 0.02634  | 0.08156        | 22  | 0.32    | 0.7497  |
| Fuel                | ULSD         |     | 0        | .              | .   | .       | .       |
| Aftertreatment      | DOC+DPF      |     | -2.7605  | 0.1740         | 22  | -15.86  | <.0001  |
| Aftertreatment      | DOC          |     | 0        | .              | .   | .       | .       |
| Driver              | Pre-April 1  |     | -0.1823  | 0.08592        | 22  | -2.12   | 0.0454  |
| Driver              | Post-April 1 |     | 0        | .              | .   | .       | .       |
| Temperature         |              |     | -0.01390 | 0.002614       | 222 | -5.32   | <.0001  |
| Route               | Avon_down    |     | -0.4276  | 0.04405        | 222 | -9.71   | <.0001  |
| Route               | Avon_up      |     | 0.3376   | 0.02267        | 222 | 14.89   | <.0001  |
| Route               | Enfield      |     | 0.4062   | 0.03014        | 222 | 13.48   | <.0001  |
| Route               | Farmington   |     | 0        | .              | .   | .       | .       |
| Tech*Fuel           | #1 D         | HDE | -0.07592 | 0.1034         | 22  | -0.73   | 0.4706  |
| Tech*Fuel           | ULSD         | HDE | 0        | .              | .   | .       | .       |
| Tech*Fuel           | #1 D         | CD  | 0        | .              | .   | .       | .       |
| Tech*Fuel           | ULSD         | CD  | 0        | .              | .   | .       | .       |
| Tech*Aftertreatment | DOC+DPF      | HDE | 0.1379   | 0.1687         | 22  | 0.82    | 0.4225  |
| Tech*Aftertreatment | DOC          | HDE | 0        | .              | .   | .       | .       |
| Tech*Aftertreatment | DOC+DPF      | CD  | 0        | .              | .   | .       | .       |
| Tech*Aftertreatment | DOC          | CD  | 0        | .              | .   | .       | .       |
| Tech*Route          | Avon_down    | HDE | 0.1139   | 0.05493        | 222 | 2.07    | 0.0392  |
| Tech*Route          | Avon_up      | HDE | -0.1054  | 0.02864        | 222 | -3.68   | 0.0003  |
| Tech*Route          | Enfield      | HDE | -0.05744 | 0.03792        | 222 | -1.51   | 0.1313  |
| Tech*Route          | Farmington   | HDE | 0        | .              | .   | .       | .       |
| Tech*Route          | Avon_down    | CD  | 0        | .              | .   | .       | .       |
| Tech*Route          | Avon_up      | CD  | 0        | .              | .   | .       | .       |
| Tech*Route          | Enfield      | CD  | 0        | .              | .   | .       | .       |



| Effect                      |            |              | Estimate | Standard Error | DF  | t Value | Pr >  t |
|-----------------------------|------------|--------------|----------|----------------|-----|---------|---------|
| <b>Tech*Route</b>           | Farmington | CD           | 0        | .              | .   | .       | .       |
| <b>Route*Driver</b>         | Avon_down  | Pre-April 1  | 0.06316  | 0.05903        | 222 | 1.07    | 0.2858  |
| <b>Route*Driver</b>         | Avon_down  | Post-April 1 | 0        | .              | .   | .       | .       |
| <b>Route*Driver</b>         | Avon_up    | Pre-April 1  | 0.1116   | 0.03014        | 222 | 3.70    | 0.0003  |
| <b>Route*Driver</b>         | Avon_up    | Post-April 1 | 0        | .              | .   | .       | .       |
| <b>Route*Driver</b>         | Enfield    | Pre-April 1  | -0.1833  | 0.03982        | 222 | -4.60   | <.0001  |
| <b>Route*Driver</b>         | Enfield    | Post-April 1 | 0        | .              | .   | .       | .       |
| <b>Route*Driver</b>         | Farmington | Pre-April 1  | 0        | .              | .   | .       | .       |
| <b>Route*Driver</b>         | Farmington | Post-April 1 | 0        | .              | .   | .       | .       |
| <b>Temperature*After</b>    | DOC+DPF    |              | -0.02595 | 0.01414        | 222 | -1.84   | 0.0677  |
| <b>Temperature*After</b>    | DOC        |              | 0        | .              | .   | .       | .       |
| <b>Route*Aftertreatment</b> | Avon_down  | DOC+DPF      | 0.9180   | 0.1299         | 222 | 7.07    | <.0001  |
| <b>Route*Aftertreatment</b> | Avon_down  | DOC          | 0        | .              | .   | .       | .       |
| <b>Route*Aftertreatment</b> | Avon_up    | DOC+DPF      | 0.3514   | 0.1264         | 222 | 2.78    | 0.0059  |
| <b>Route*Aftertreatment</b> | Avon_up    | DOC          | 0        | .              | .   | .       | .       |
| <b>Route*Aftertreatment</b> | Enfield    | DOC+DPF      | 0.2520   | 0.1317         | 222 | 1.91    | 0.0570  |
| <b>Route*Aftertreatment</b> | Enfield    | DOC          | 0        | .              | .   | .       | .       |
| <b>Route*Aftertreatment</b> | Farmington | DOC+DPF      | 0        | .              | .   | .       | .       |
| <b>Route*Aftertreatment</b> | Farmington | DOC          | 0        | .              | .   | .       | .       |



### Differences in Least Square means

The simulation method within SAS<sup>®</sup> is used to compute the adjusted *p*-values.

**Table S-12. Differences of Tech×Fuel Least Square Means**

| Effect    | Tech | Fuel | _Tech | _Fuel | Estimate | StdErr  | DF | tValue | Adjp   |
|-----------|------|------|-------|-------|----------|---------|----|--------|--------|
| Tech*Fuel | HDE  | #1 D | HDE   | ULSD  | -0.04958 | 0.08156 | 22 | -0.61  | 0.9271 |
| Tech*Fuel | CD   | #1 D | CD    | ULSD  | 0.02634  | 0.08156 | 22 | 0.32   | 0.9874 |
| Tech*Fuel | HDE  | #1 D | CD    | #1 D  | 0.2686   | 0.1083  | 22 | 2.48   | 0.0212 |
| Tech*Fuel | HDE  | ULSD | CD    | ULSD  | 0.3446   | 0.08437 | 22 | 4.08   | 0.0005 |

**Table S-13. Differences of Tech×Aftertreatment Least Square Means**

| Effect     | Tech | After   | _Tech | _After  | Estimate | StdErr  | DF | tValue | Adjp   |
|------------|------|---------|-------|---------|----------|---------|----|--------|--------|
| Tech*After | HDE  | DOC+DPF | HDE   | DOC     | -2.5699  | 0.1036  | 22 | -24.81 | <.0001 |
| Tech*After | CD   | DOC+DPF | CD    | DOC     | -2.7078  | 0.1340  | 22 | -20.21 | <.0001 |
| Tech*After | HDE  | DOC+DPF | CD    | DOC+DPF | 0.3755   | 0.1574  | 22 | 2.39   | 0.0261 |
| Tech*After | HDE  | DOC     | CD    | DOC     | 0.2376   | 0.05428 | 22 | 4.38   | 0.0002 |

**Table S-14. Differences of Tech×Route Least Square Means**

| Effect     | Tech | Route      | _Tech | _Route     | Estimate | StdErr  | DF  | tValue | Adjp   |
|------------|------|------------|-------|------------|----------|---------|-----|--------|--------|
| Tech*Route | HDE  | Avon_down  | HDE   | Avon_up    | -0.2867  | 0.07196 | 222 | -3.98  | 0.0018 |
| Tech*Route | HDE  | Avon_down  | HDE   | Enfield    | -0.2062  | 0.07611 | 222 | -2.71  | 0.0900 |
| Tech*Route | HDE  | Avon_down  | HDE   | Farmington | 0.1769   | 0.07332 | 222 | 2.41   | 0.1747 |
| Tech*Route | HDE  | Avon_up    | HDE   | Enfield    | 0.08053  | 0.06862 | 222 | 1.17   | 0.8758 |
| Tech*Route | HDE  | Avon_up    | HDE   | Farmington | 0.4636   | 0.06564 | 222 | 7.06   | <.0001 |
| Tech*Route | HDE  | Enfield    | HDE   | Farmington | 0.3831   | 0.07010 | 222 | 5.47   | <.0001 |
| Tech*Route | CD   | Avon_down  | CD    | Avon_up    | -0.5060  | 0.07028 | 222 | -7.20  | <.0001 |
| Tech*Route | CD   | Avon_down  | CD    | Enfield    | -0.3775  | 0.07354 | 222 | -5.13  | <.0001 |
| Tech*Route | CD   | Avon_down  | CD    | Farmington | 0.06302  | 0.07142 | 222 | 0.88   | 0.9627 |
| Tech*Route | CD   | Avon_up    | CD    | Enfield    | 0.1285   | 0.06751 | 222 | 1.90   | 0.4357 |
| Tech*Route | CD   | Avon_up    | CD    | Farmington | 0.5690   | 0.06507 | 222 | 8.75   | <.0001 |
| Tech*Route | CD   | Enfield    | CD    | Farmington | 0.4406   | 0.06869 | 222 | 6.41   | <.0001 |
| Tech*Route | HDE  | Avon_down  | CD    | Avon_down  | 0.4328   | 0.09243 | 222 | 4.68   | 0.0001 |
| Tech*Route | HDE  | Avon_up    | CD    | Avon_up    | 0.2134   | 0.08303 | 222 | 2.57   | 0.1254 |
| Tech*Route | HDE  | Enfield    | CD    | Enfield    | 0.2614   | 0.08582 | 222 | 3.05   | 0.0388 |
| Tech*Route | HDE  | Farmington | CD    | Farmington | 0.3188   | 0.08491 | 222 | 3.75   | 0.0034 |



**Table S-15. Differences of Route×Driver Least Square Means**

| <b>Effect</b> | <b>Route</b> | <b>Driver</b> | <b>_Route</b> | <b>_Driver</b> | <b>Estimate</b> | <b>StdErr</b> | <b>DF</b> | <b>tValue</b> | <b>AdjP</b> |
|---------------|--------------|---------------|---------------|----------------|-----------------|---------------|-----------|---------------|-------------|
| Route*Driver  | Avon_down    | Pre-April 1   | Avon_down     | Post-April 1   | -0.1191         | 0.09738       | 222       | -1.22         | 0.8539      |
| Route*Driver  | Avon_up      | Pre-April 1   | Avon_up       | Post-April 1   | -0.07073        | 0.08310       | 222       | -0.85         | 0.9695      |
| Route*Driver  | Enfield      | Pre-April 1   | Enfield       | Post-April 1   | -0.3656         | 0.08680       | 222       | -4.21         | <.0001      |
| Route*Driver  | Farmington   | Pre-April 1   | Farmington    | Post-April 1   | -0.1823         | 0.08592       | 222       | -2.12         | 0.3129      |
| Route*Driver  | Avon_down    | Pre-April 1   | Avon_up       | Pre-April 1    | -0.4206         | 0.07837       | 222       | -5.37         | <.0001      |
| Route*Driver  | Avon_down    | Pre-April 1   | Enfield       | Pre-April 1    | -0.1686         | 0.08321       | 222       | -2.03         | 0.3684      |
| Route*Driver  | Avon_down    | Pre-April 1   | Farmington    | Pre-April 1    | 0.1516          | 0.08057       | 222       | 1.88          | 0.4593      |
| Route*Driver  | Avon_down    | Post-April 1  | Avon_up       | Post-April 1   | -0.3722         | 0.06463       | 222       | -5.76         | <.0001      |
| Route*Driver  | Avon_down    | Post-April 1  | Enfield       | Post-April 1   | -0.4151         | 0.06720       | 222       | -6.18         | <.0001      |
| Route*Driver  | Avon_down    | Post-April 1  | Farmington    | Post-April 1   | 0.08840         | 0.06495       | 222       | 1.36          | 0.7848      |
| Route*Driver  | Avon_up      | Pre-April 1   | Enfield       | Pre-April 1    | 0.2520          | 0.07083       | 222       | 3.56          | 0.0084      |
| Route*Driver  | Avon_up      | Pre-April 1   | Farmington    | Pre-April 1    | 0.5721          | 0.06775       | 222       | 8.44          | <.0001      |
| Route*Driver  | Avon_up      | Post-April 1  | Enfield       | Post-April 1   | -0.04293        | 0.06554       | 222       | -0.66         | 0.9924      |
| Route*Driver  | Avon_up      | Post-April 1  | Farmington    | Post-April 1   | 0.4606          | 0.06322       | 222       | 7.28          | <.0001      |
| Route*Driver  | Enfield      | Pre-April 1   | Farmington    | Pre-April 1    | 0.3202          | 0.07327       | 222       | 4.37          | 0.0002      |
| Route*Driver  | Enfield      | Post-April 1  | Farmington    | Post-April 1   | 0.5035          | 0.06585       | 222       | 7.65          | <.0001      |



**Table S-16. Differences of Route×Aftertreatment Least Square Means**

| <b>Effect</b> | <b>Route</b> | <b>After</b> | <b>_Route</b> | <b>_After</b> | <b>Estimate</b> | <b>StdErr</b> | <b>DF</b> | <b>tValue</b> | <b>Adjp</b> |
|---------------|--------------|--------------|---------------|---------------|-----------------|---------------|-----------|---------------|-------------|
| Route*After   | Avon_down    | DOC+DPF      | Avon_up       | DOC+DPF       | -0.1130         | 0.1281        | 222       | -0.88         | 0.9833      |
| Route*After   | Avon_down    | DOC+DPF      | Enfield       | DOC+DPF       | 0.04119         | 0.1331        | 222       | 0.31          | 1.0000      |
| Route*After   | Avon_down    | DOC+DPF      | Farmington    | DOC+DPF       | 0.5790          | 0.1286        | 222       | 4.50          | <.0001      |
| Route*After   | Avon_down    | DOC          | Avon_up       | DOC           | -0.6797         | 0.02743       | 222       | -24.78        | <.0001      |
| Route*After   | Avon_down    | DOC          | Enfield       | DOC           | -0.6249         | 0.03036       | 222       | -20.58        | <.0001      |
| Route*After   | Avon_down    | DOC          | Farmington    | DOC           | -0.3390         | 0.02952       | 222       | -11.49        | <.0001      |
| Route*After   | Avon_up      | DOC+DPF      | Enfield       | DOC+DPF       | 0.1542          | 0.1307        | 222       | 1.18          | 0.9173      |
| Route*After   | Avon_up      | DOC+DPF      | Farmington    | DOC+DPF       | 0.6920          | 0.1261        | 222       | 5.49          | <.0001      |
| Route*After   | Avon_up      | DOC          | Enfield       | DOC           | 0.05481         | 0.01666       | 222       | 3.29          | 0.0180      |
| Route*After   | Avon_up      | DOC          | Farmington    | DOC           | 0.3406          | 0.01507       | 222       | 22.60         | <.0001      |
| Route*After   | Enfield      | DOC+DPF      | Farmington    | DOC+DPF       | 0.5378          | 0.1311        | 222       | 4.10          | 0.0014      |
| Route*After   | Enfield      | DOC          | Farmington    | DOC           | 0.2858          | 0.01991       | 222       | 14.36         | <.0001      |
| Route*After   | Avon_down    | DOC+DPF      | Avon_down     | DOC           | -2.1012         | 0.1177        | 222       | -17.85        | <.0001      |
| Route*After   | Avon_up      | DOC+DPF      | Avon_up       | DOC           | -2.6678         | 0.1139        | 222       | -23.41        | <.0001      |
| Route*After   | Enfield      | DOC+DPF      | Enfield       | DOC           | -2.7672         | 0.1202        | 222       | -23.03        | <.0001      |
| Route*After   | Farmington   | DOC+DPF      | Farmington    | DOC           | -3.0192         | 0.1147        | 222       | -26.33        | <.0001      |



**Table S-17. Type 3 Tests of Fixed Effects for Model that does not include Bus and Day Random Effects (Compare with Table S-10)**

| <b>Effect</b>                     | <b>Num DF</b> | <b>Den DF</b> | <b>F Value</b> | <b>Pr &gt; F</b> |
|-----------------------------------|---------------|---------------|----------------|------------------|
| <b>Tech</b>                       | 1             | 246           | 29.79          | <.0001           |
| <b>Fuel</b>                       | 1             | 246           | 0.08           | 0.7821           |
| <b>Aftertreatment</b>             | 1             | 246           | 294.12         | <.0001           |
| <b>Driver</b>                     | 1             | 246           | 7.02           | 0.0086           |
| <b>Temperature</b>                | 1             | 246           | 23.02          | <.0001           |
| <b>Route</b>                      | 3             | 246           | 26.88          | <.0001           |
| <b>Tech*Fuel</b>                  | 1             | 246           | 0.39           | 0.5306           |
| <b>Tech*Aftertreatment</b>        | 1             | 246           | 2.22           | 0.1376           |
| <b>Tech*Route</b>                 | 3             | 246           | 4.29           | 0.0057           |
| <b>Route*Driver</b>               | 3             | 246           | 10.00          | <.0001           |
| <b>Temperature*Aftertreatment</b> | 1             | 246           | 7.54           | 0.0065           |
| <b>Route*Aftertreatment</b>       | 3             | 246           | 17.65          | <.0001           |
